# Supplementary material for: Categorial Compositionality II: Universal Constructions and a General Theory of (Quasi-)Systematicity in Human Cognition
Source: PubMed Central journal article supplement (PMC3154512; doi:10.1371/journal.pcbi.1002102), 2011-08-04
Supplement: pcbi.1002102.s024.pdf [file pcbi.1002102.s024.pdf]

**Text S1****Notation**

| Symbol                                                          | Referent                                                                           |
|-----------------------------------------------------------------|------------------------------------------------------------------------------------|
| $\emptyset$                                                     | empty set                                                                          |
| $\in$                                                           | is a member of                                                                     |
| $\subseteq$                                                     | is a subset of                                                                     |
| $\cong$                                                         | is isomorphic to                                                                   |
| $\not\cong$                                                     | is not isomorphic to                                                               |
| $\dashv$                                                        | is left adjoint to                                                                 |
| $\mapsto$                                                       | maps to                                                                            |
| $\rightarrow$                                                   | arrow, morphism, map                                                               |
| $\dashrightarrow$                                               | uniquely existing arrow                                                            |
| $\dot{\rightarrow}$                                             | natural transformation                                                             |
| $A, B, C, \dots$                                                | objects                                                                            |
| $f, g, h, \dots$                                                | morphisms                                                                          |
| $F, G, H, \dots$                                                | functors                                                                           |
| $\eta, \epsilon, \dots$                                         | natural transformations                                                            |
| $\mathbf{C}, \mathbf{D}, \dots$                                 | categories                                                                         |
| $ \mathbf{C} $                                                  | the class of objects in category $\mathbf{C}$                                      |
| $f : A \rightarrow B$                                           | morphism $f$ from domain object $A$ to codomain object $B$                         |
| $F : \mathbf{C} \rightarrow \mathbf{D}$                         | functor $F$ from domain category $\mathbf{C}$ to codomain category $\mathbf{D}$    |
| $\eta : F \dot{\rightarrow} G$                                  | natural transformation $\eta$ from domain functor $F$ to codomain functor $G$      |
| <b>Set</b>                                                      | category with sets for objects and functions for morphisms                         |
| <b>0, 1, 2</b>                                                  | category with zero, one, two objects and no non-identity morphisms                 |
| $(T \downarrow S)$                                              | comma category from functors $T$ and $S$                                           |
| $\mathbf{D}^{\mathbf{C}}, \text{Funct}(\mathbf{C}, \mathbf{D})$ | category of functors from $\mathbf{C}$ to $\mathbf{D}$ and natural transformations |
| <b>J</b>                                                        | shape category                                                                     |

|                                                             |                                                                                         |
|-------------------------------------------------------------|-----------------------------------------------------------------------------------------|
| $\mathbf{0}$ ,                                              | empty shape category                                                                    |
| $\mathbf{1}, \cdot$                                         | (one-object discrete) singleton shape category                                          |
| $\mathbf{2}, \cdot \cdot$                                   | (two-object discrete) pair shape category                                               |
| $\Downarrow, \cdot \rightrightarrows \cdot$                 | parallel shape category                                                                 |
| $\ast, \cdot \rightarrow \cdot \leftarrow \cdot$            | sink shape category                                                                     |
| $\leftrightarrow, \cdot \leftarrow \cdot \rightarrow \cdot$ | cosink shape category                                                                   |
| $\mathbf{C}^0$                                              | category of empty shaped diagrams, $\mathbf{C}^0 \cong \mathbf{1}$                      |
| $\mathbf{C}^2$                                              | category of pair shaped diagrams, $\mathbf{C}^2 \cong \mathbf{C} \times \mathbf{C}$     |
| $0, 1, \mathbf{0}$                                          | initial, terminal, zero object                                                          |
| $\ast$                                                      | object in a one-object category, such as $\mathbf{1}$                                   |
| $A \times B$                                                | product of objects $A$ and $B$                                                          |
| $A + B$                                                     | coproduct of objects $A$ and $B$                                                        |
| $A \times_C B$                                              | pullback (fiber product) of objects $A$ and $B$ constrained at $C$                      |
| $A +_C B$                                                   | pushout (fiber coproduct) of objects $A$ and $B$ constrained at $C$                     |
| $(A, B)$                                                    | pair of objects $A$ and $B$                                                             |
| $f \circ g$                                                 | composition of morphism $f$ with morphism $g$                                           |
| $\langle f, g \rangle$                                      | diverging pair of arrows, having a common domain                                        |
| $[f, g]$                                                    | converging pair of arrows, having a common codomain                                     |
| $(f, g)$                                                    | parallel pair of arrows, having distinct (co)domains                                    |
| $f \times g$                                                | product of arrows $f$ and $g$                                                           |
| $0_A : 0 \rightarrow A$                                     | morphism from an initial object $0$                                                     |
| $1_A : A \rightarrow 1$                                     | morphism to a terminal object $1$                                                       |
| $1_A : A \rightarrow A$                                     | identity morphism on object $A$                                                         |
| $1_{\mathbf{C}} : \mathbf{C} \rightarrow \mathbf{C}$        | identity functor on category $\mathbf{C}$ , $1_{\mathbf{C}} : X \mapsto X, f \mapsto f$ |
| $1_F : F \rightrightarrows F$                               | identity natural transformation on functor $F$ , $1_{F_X} : F(X) \rightarrow F(X)$      |
| $F_A : \mathbf{C} \rightarrow \mathbf{D}$                   | constant functor, $F_A : X \mapsto A, f \mapsto 1_A$ , for all $X \in  \mathbf{C} $     |
| $D : \mathbf{J} \rightarrow \mathbf{C}$                     | diagram (functor) $D$ of (from) shape $\mathbf{J}$ in (to) category $\mathbf{C}$        |

|                                                                        |                                                                                                                |
|------------------------------------------------------------------------|----------------------------------------------------------------------------------------------------------------|
| $D_A : \mathbf{J} \rightarrow \mathbf{C}$                              | constant diagram, $D_A : X \mapsto A, f \mapsto 1_A$ , for all $X, f$ in $\mathbf{J}$                          |
| $D_\emptyset : \mathbf{0} \rightarrow \mathbf{C}$                      | empty diagram                                                                                                  |
| $\Delta_0 : \mathbf{C} \rightarrow \mathbf{C}^0$                       | constant diagonal functor, $\Delta_0 : A \mapsto *, f \mapsto 1_*$ , for all $A, f$ in $\mathbf{C}$            |
| $\Delta_2 : \mathbf{C} \rightarrow \mathbf{C}^2$                       | pair diagonal functor, $\Delta_2 : A \mapsto (A, A), f \mapsto (f, f)$                                         |
| $\Delta_{\parallel} : \mathbf{C} \rightarrow \mathbf{C}^{\parallel}$   | parallel diagonal functor, $\Delta_{\parallel} : A \mapsto (1_A, 1_A), f \mapsto (f, f)$                       |
| $\Delta_* : \mathbf{C} \rightarrow \mathbf{C}^*$                       | sink diagonal functor, $\Delta_* : A \mapsto (1_A, 1_A), f \mapsto (f, f)$                                     |
| $\Delta_{\leftarrow} : \mathbf{C} \rightarrow \mathbf{C}^{\leftarrow}$ | cosink diagonal functor, $\Delta_{\leftarrow} : A \mapsto (1_A, 1_A), f \mapsto (f, f)$                        |
| $\Delta : \mathbf{C} \rightarrow \mathbf{C}^{\mathbf{J}}$              | general diagonal functor, $\Delta : A \mapsto D_A, (f : X \rightarrow Y) \mapsto (\eta : D_A \rightarrow D_B)$ |
| $V, W$                                                                 | vertex object $V$ of a cone, vertex object $W$ of a cocone                                                     |
| $\underline{L}, \underline{L}$                                         | vertex $\underline{L}$ of a (limit/terminal) cone, vertex $\underline{L}$ of a (colimit/initial) cocone        |
| $(V, \phi)$                                                            | cone with vertex $V$ and leg morphisms $\phi$                                                                  |
| $(W, \psi)$                                                            | cocone with vertex $W$ and leg morphisms $\psi$                                                                |
| $\phi : D_V \rightarrow D$                                             | cone (natural transformation) $\phi$ with vertex $V, \phi_I : V \rightarrow D(I)$                              |
| $\psi : D \rightarrow D_W$                                             | cocone (natural transformation) $\psi$ with vertex $W, \psi_I : D(I) \rightarrow W$                            |
| $\kappa : D_{\underline{L}} \rightarrow D$                             | cone (natural transformation) $\kappa$ with vertex $\underline{L}, \kappa_I : \underline{L} \rightarrow D(I)$  |
| $\chi : D \rightarrow D_{\underline{L}}$                               | cocone (natural transformation) $\chi$ with vertex $\underline{L}, \chi_I : D(I) \rightarrow \underline{L}$    |
| $\underline{\lim}_0 : D_\emptyset \rightarrow D_\emptyset$             | terminal limit (cone), $(1, 1_1)$                                                                              |
| $\underline{\lim}_0 : D_\emptyset \rightarrow D_\emptyset$             | initial limit (cocone), $(0, 0_1)$                                                                             |
| $\underline{\lim}_{\parallel} : D_E \rightarrow D$                     | equalizer limit (cone), $(E, e)$                                                                               |
| $\underline{\lim}_{\parallel} : D \rightarrow D_Q$                     | coequalizer limit (cocone), $(Q, q)$                                                                           |
| $\underline{\lim}_2 : D_{A \times B} \rightarrow D$                    | product limit (cone), $(A \times B, p_i)$ , for $i \in \{1, 2\}$                                               |
| $\underline{\lim}_2 : D \rightarrow D_{A+B}$                           | coproduct limit (cocone), $(A + B, q_i)$ , for $i \in \{1, 2\}$                                                |
| $\underline{\lim}_* : D_{A \times_C B} \rightarrow D$                  | pullback limit (cone), $(A \times_C B, p_i)$ , for $i \in \{1, 2\}$                                            |
| $\underline{\lim}_{\leftarrow} : D \rightarrow D_{A+C B}$              | pushout limit (cocone), $(A +_C B, q_i)$ , for $i \in \{1, 2\}$                                                |
| $\underline{\lim} : D_{\underline{L}} \rightarrow D$                   | general limit (cone), $\underline{\lim}_X : \underline{L} \rightarrow D(X)$                                    |
| $\underline{\lim} : D \rightarrow D_{\underline{L}}$                   | general colimit (cocone), $\underline{\lim}_X : D(X) \rightarrow \underline{L}$                                |
| $\underline{\lim}_0 : \mathbf{C}^0 \rightarrow \mathbf{C}$             | terminal (limit) functor, $\underline{\lim}_0 : * \mapsto 1, 1_* \mapsto 1_1$                                  |

|                                                                                        |                                                                                                                                                    |
|----------------------------------------------------------------------------------------|----------------------------------------------------------------------------------------------------------------------------------------------------|
| $\underline{Lim}_{\mathbf{0}} : \mathbf{C}^{\mathbf{0}} \rightarrow \mathbf{C}$        | initial (colimit) functor, $\underline{Lim}_{\mathbf{0}} : * \mapsto 0, 1_* \mapsto 1_0$                                                           |
| $\underline{Lim}_{\Downarrow} : \mathbf{C}^{\Downarrow} \rightarrow \mathbf{C}$        | equalizer (limit) functor, $\underline{Lim}_{\Downarrow} : (f, g) \mapsto (E, e), (h, f \circ h) \mapsto h$                                        |
| $\underline{Lim}_{\Downarrow} : \mathbf{C}^{\Downarrow} \rightarrow \mathbf{C}$        | coequalizer (colimit) functor, $\underline{Lim}_{\Downarrow} : (f, g) \mapsto (Q, q), (h \circ f, f) \mapsto h$                                    |
| $\underline{Lim}_{\mathbf{2}}, \Pi : \mathbf{C}^{\mathbf{2}} \rightarrow \mathbf{C}$   | product (limit) functor, $\Pi : (A, B) \mapsto A \times B, (f, g) \mapsto f \times g$                                                              |
| $\underline{Lim}_{\mathbf{2}}, \Pi : \mathbf{C}^{\mathbf{2}} \rightarrow \mathbf{C}$   | coproduct (colimit) functor, $\Pi : (A, B) \mapsto A + B, (f, g) \mapsto f + g$                                                                    |
| $\underline{Lim}_{*}, \Pi_C : \mathbf{C}^* \rightarrow \mathbf{C}$                     | pullback (limit) functor, $\Pi_C : (A, B) \mapsto A \times_C B, (f, g) \mapsto f \times g$                                                         |
| $\underline{Lim}_{\Leftarrow}, \Pi_C : \mathbf{C}^{\Leftarrow} \rightarrow \mathbf{C}$ | pushout (colimit) functor, $\Pi_C : (A, B) \mapsto A +_C B, (f, g) \mapsto f + g$                                                                  |
| $\underline{Lim} : \mathbf{C}^{\mathbf{J}} \rightarrow \mathbf{C}$                     | general limit functor, $\underline{Lim} : D \mapsto \underline{L}, (\eta : D \rightarrow D') \mapsto (\underline{L} \rightarrow \underline{L}')$   |
| $\underline{Lim} : \mathbf{C}^{\mathbf{J}} \rightarrow \mathbf{C}$                     | general colimit functor, $\underline{Lim} : D \mapsto \underline{L}, (\eta : D \rightarrow D') \mapsto (\underline{L} \rightarrow \underline{L}')$ |
