# Supplementary material for: Categorial Compositionality II: Universal Constructions and a General Theory of (Quasi-)Systematicity in Human Cognition
Source: PLOS journal article supplement (doi:10.1371/journal.pcbi.1002102), 2011-08-04
Supplement: S26 (10.1371/journal.pcbi.1002102.s026) [file journal.pcbi.1002102.s026]

301 Moved Permanently

# Moved Permanently

The document has moved here.

---

Apache Server at www.ploscompbiol.org Port 80
